# Supplementary material for: Histone H3K27 acetylation is dispensable for enhancer activity in mouse embryonic stem cells
Source: PubMed Central journal article supplement (PMC7035716; doi:10.1186/s13059-020-01957-w), 2020-02-21
Supplement: 13059_2020_1957_MOESM2_ESM.pdf [file 13059_2020_1957_MOESM2_ESM.pdf]

## Supplementary figures:

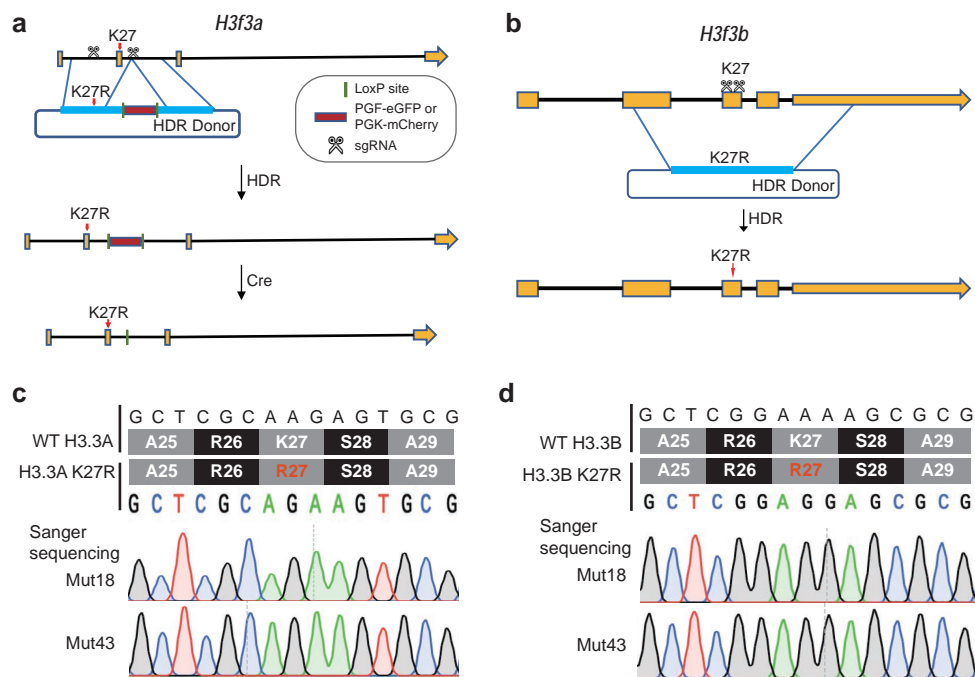

**Figure S1.** Strategy for CRISPR-Cas9-mediated gene editing at *H3f3a* and *H3f3b* loci. (a-b) Schematic representation of the CRISPR-Cas9-mediated nucleotide substitution at *H3f3a* and *H3f3b* loci in mouse ESCs. HDR, homology-directed repair. (c-d) Sanger sequencing of reverse transcribed mRNA sequences to validate successfully mutated ESC clones (Mut18 and Mut43).

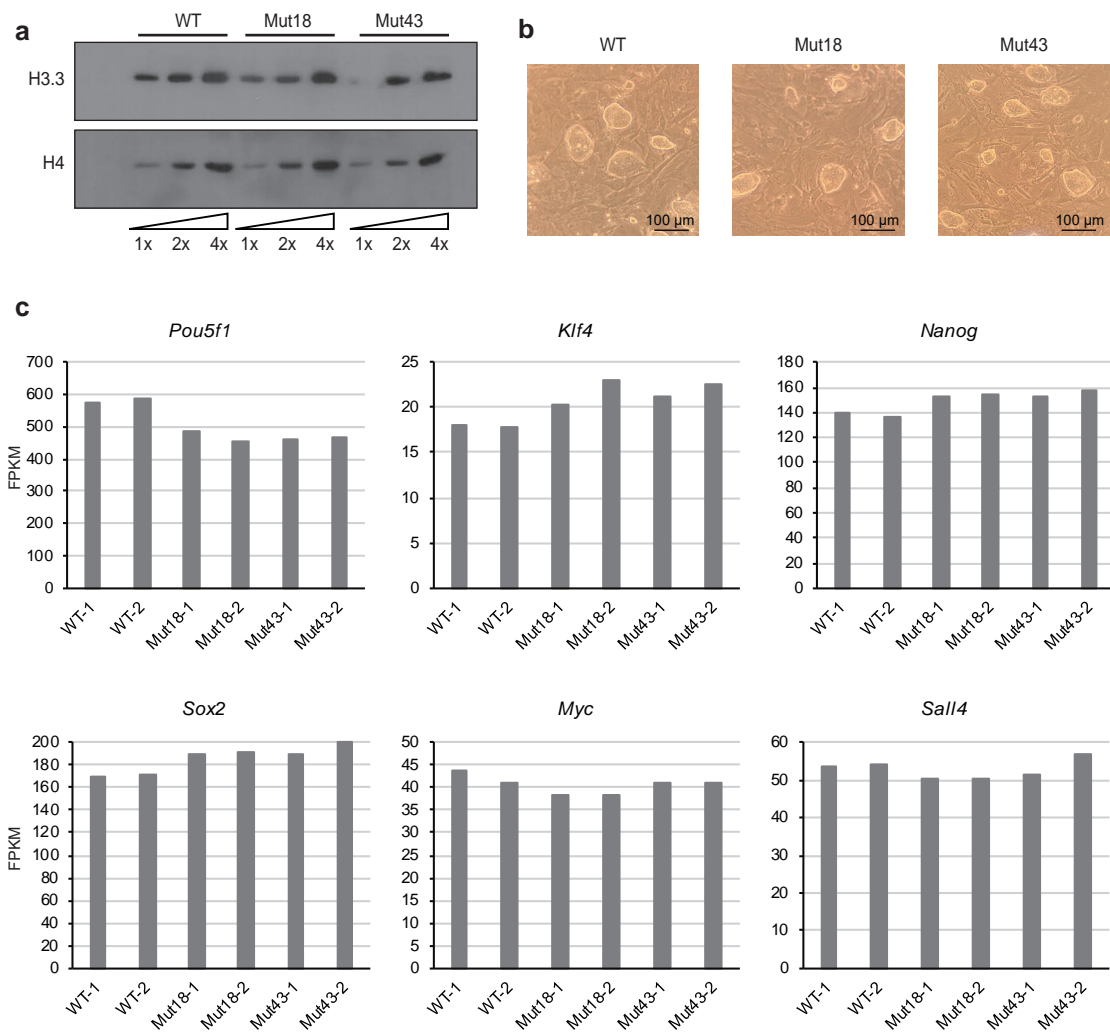

**Figure S2.** H3.3K27R mutation does not affect the H3.3 protein level and pluripotent state of ESCs. **(a)** Western blot of H3.3 protein from WT and H3.3K27R mutant mouse ESC lines. **(b)** Representative images showing the colony morphology of WT and H3.3K27R mutant mouse ESC lines. **(c)** Expression levels of key pluripotent genes in WT and H3.3K27R mutant mouse ESC lines.

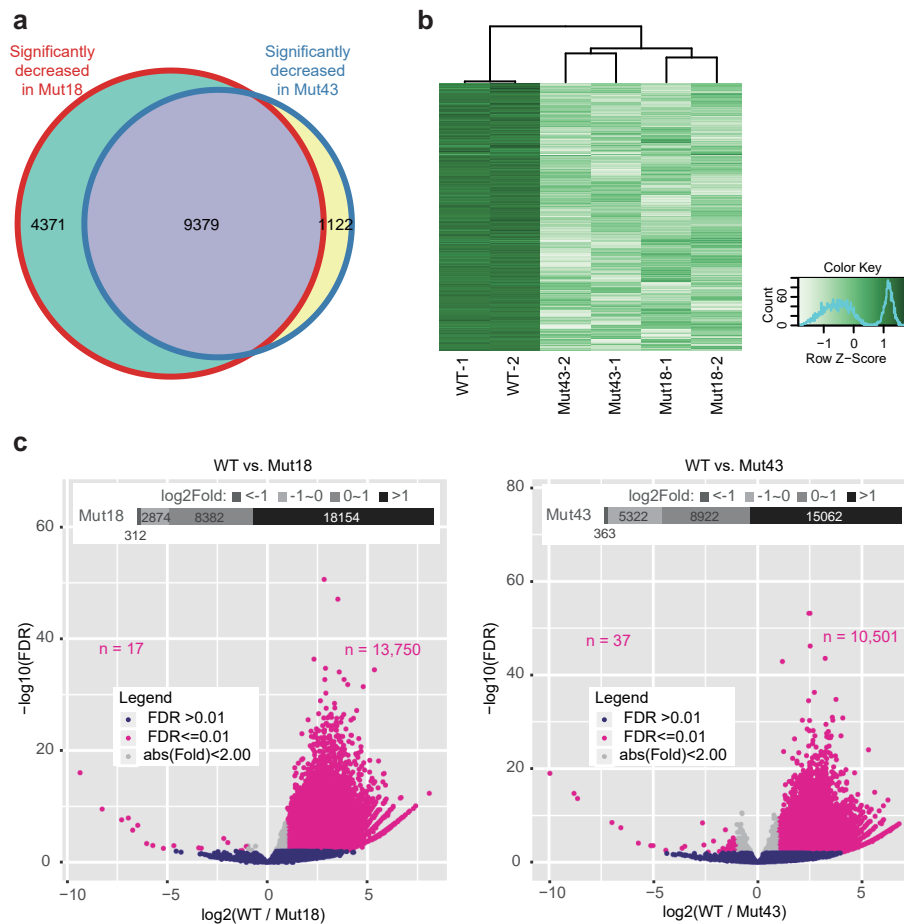

**Figure S3.** Genome-wide decrease in H3K27ac levels in individual H3.3K27R mutant mouse ESC lines. **(a)** Venn diagram showing comparable H3K27ac decreases in both H3.3K27R mutant mouse ESC lines. **(b)** Heatmap clustering of H3K27ac ChIP-seq signals showing a genome-wide reduction of H3K27ac in H3.3K27R mutant mouse ESC lines. Consensus peak set used are those peaks shared by at least two samples. **(c)** Volcano plots illustrating the H3K27ac ChIP-seq signal changes in two H3.3K27R mutant ESC lines in comparison with WT ESCs, respectively. Inlet diagram representing peak numbers in different categories of fold changes. FDR, false discovery rate.

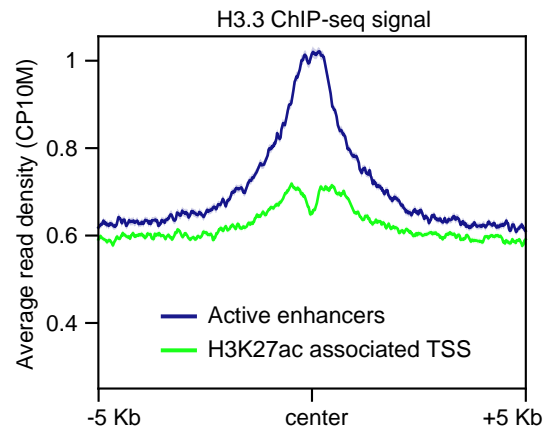

**Figure S4.** Averaged profiles of H3.3 at active enhancers and H3K27-occupied promoters in mouse ESCs. Reads densities were normalized to the sequencing depth of 10 M read pairs, and averaged for all covered regions of interest. H3.3 ChIP-seq data were adopted from GEO database under the accession number of GSE117035.

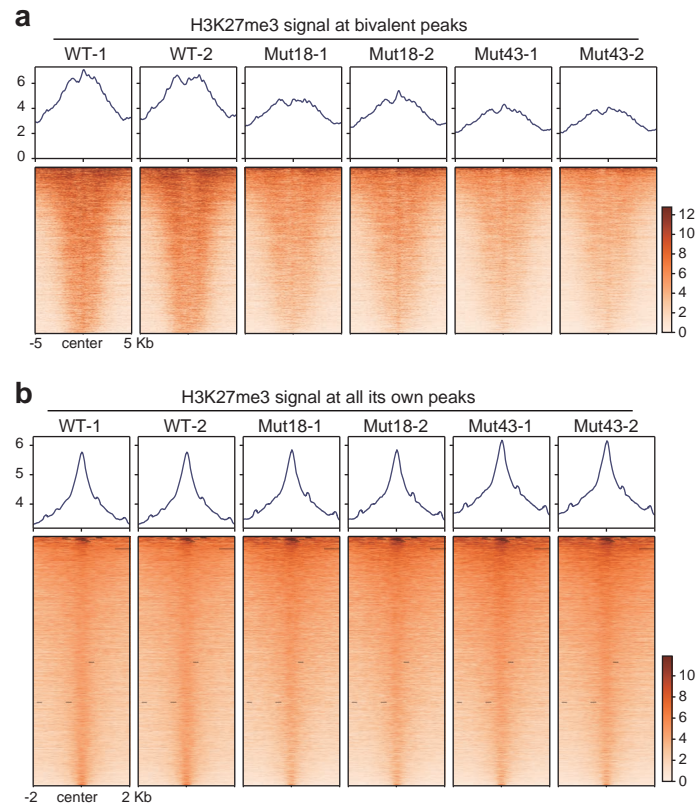

**Figure S5.** H3.3K27R mutation does not affect the genome-wide distribution of H3K27me3 in mouse ESCs. **(a)** Averaged profiles (upper) and heatmap plots (lower) of the H3K27me3 ChIP-seq signal at bivalent peaks in WT and H3.3K27R mutant mouse ESC lines. All biological duplicates are shown. **(b)** Averaged profiles (upper) and heatmap plots (lower) of the H3K27me3 ChIP-seq signal at all H3K27me3 peaks in WT and H3.3K27R mutant mouse ESC lines. All biological duplicates are shown.

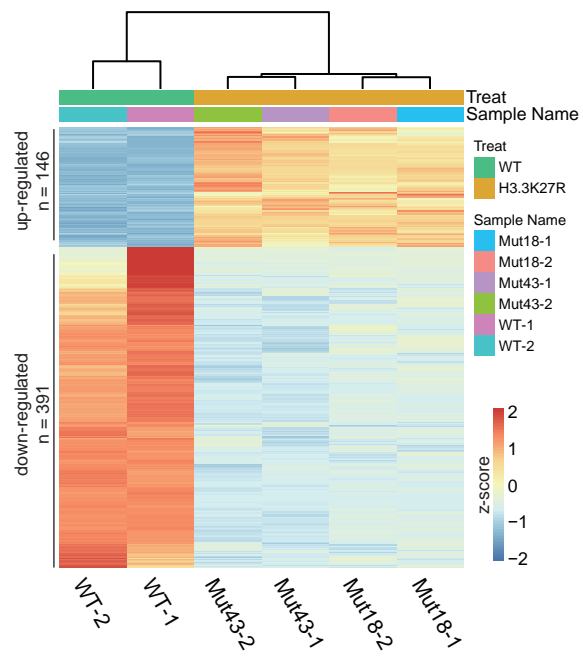

**Figure S6.** Heatmap clustering of differentially expressed genes in WT and H3.3K27R mutant mouse ESC lines.

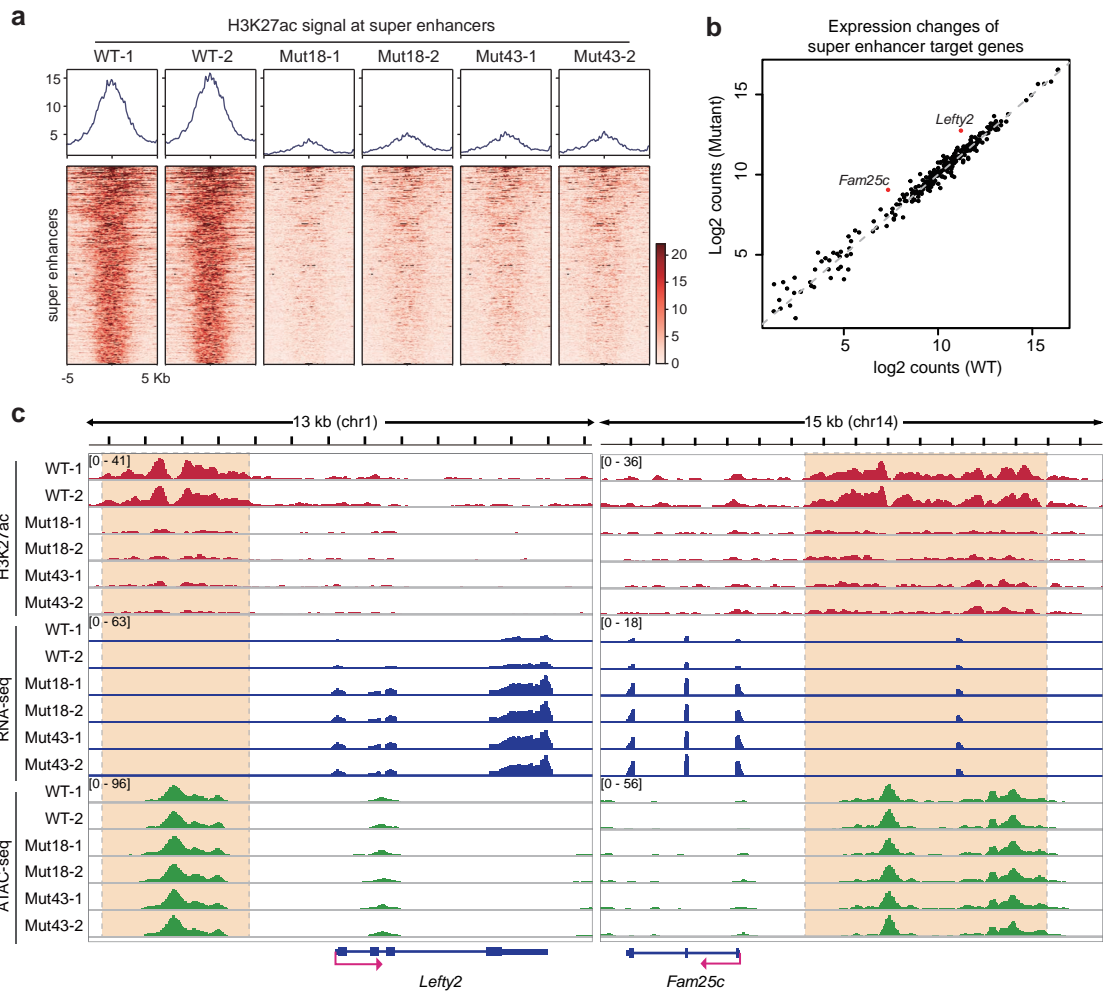

**Figure S7.** H3.3K27R mutation does not affect the transcription of genes associated with super enhancers in mouse ESCs. **(a)** Heatmap plots of the H3K27ac ChIP-seq signal at super-enhancers in WT and H3.3K27R mutant mouse ESC lines. All biological duplicates are shown. **(b)** Dot plot depicting transcription changes in genes associated with super enhancers in H3.3K27R mutant mouse ESCs compared to WT ESCs. Genes upregulated for 2-fold with an FDR < 0.05 are shown in red. **(c)** Genome browser representations of H3K27ac ChIP-seq, mRNA-seq, and ATAC-seq signal in WT and H3.3K27R mutant ESC lines at the *Lefty2* and *Fam25c* loci. Super-enhancer regions of each gene are highlighted with dashed line boxes.

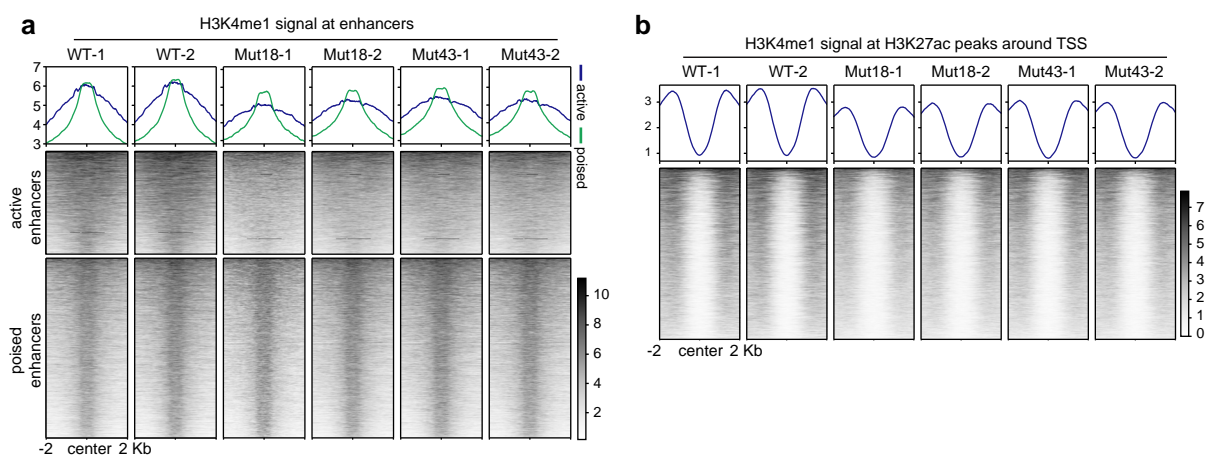

**Figure S8.** H3K4me1 distribution at enhancers and H3K27ac-occupied promoters in WT and H3.3K27R mutant ESC lines. **(a-b)** H3K4me1 ChIP-seq signals in WT and H3.3K27R mutant mouse ESC lines at enhancers **(a)** and H3K27ac-occupied TSS **(b)**. Upper, averaged profiles of the H3K4me1 ChIP-seq signal at enhancers and H3K27ac-occupied TSS, respectively. Lower, heatmap plots of the H3K4me1 ChIP-seq signal at enhancers and H3K27ac-occupied TSS, respectively. All biological duplicates are shown.



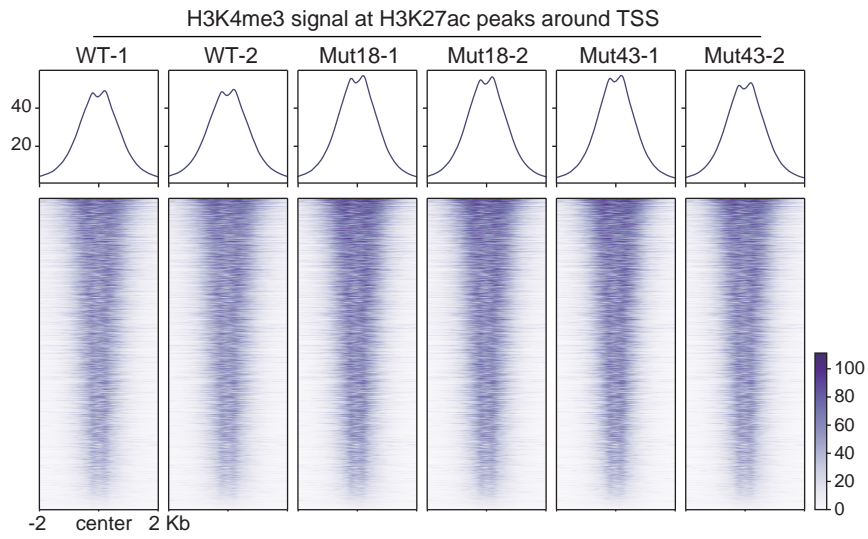

**Figure S9.** H3K4me3 distribution at H3K27ac-occupied promoters in WT and H3.3K27R mutant ESC lines. Upper, averaged profiles of the H3K4me3 ChIP-seq signal at H3K27ac-occupied TSS. Lower, heatmap plots of the H3K4me3 ChIP-seq signal at H3K27ac-occupied TSS. All biological duplicates are shown.

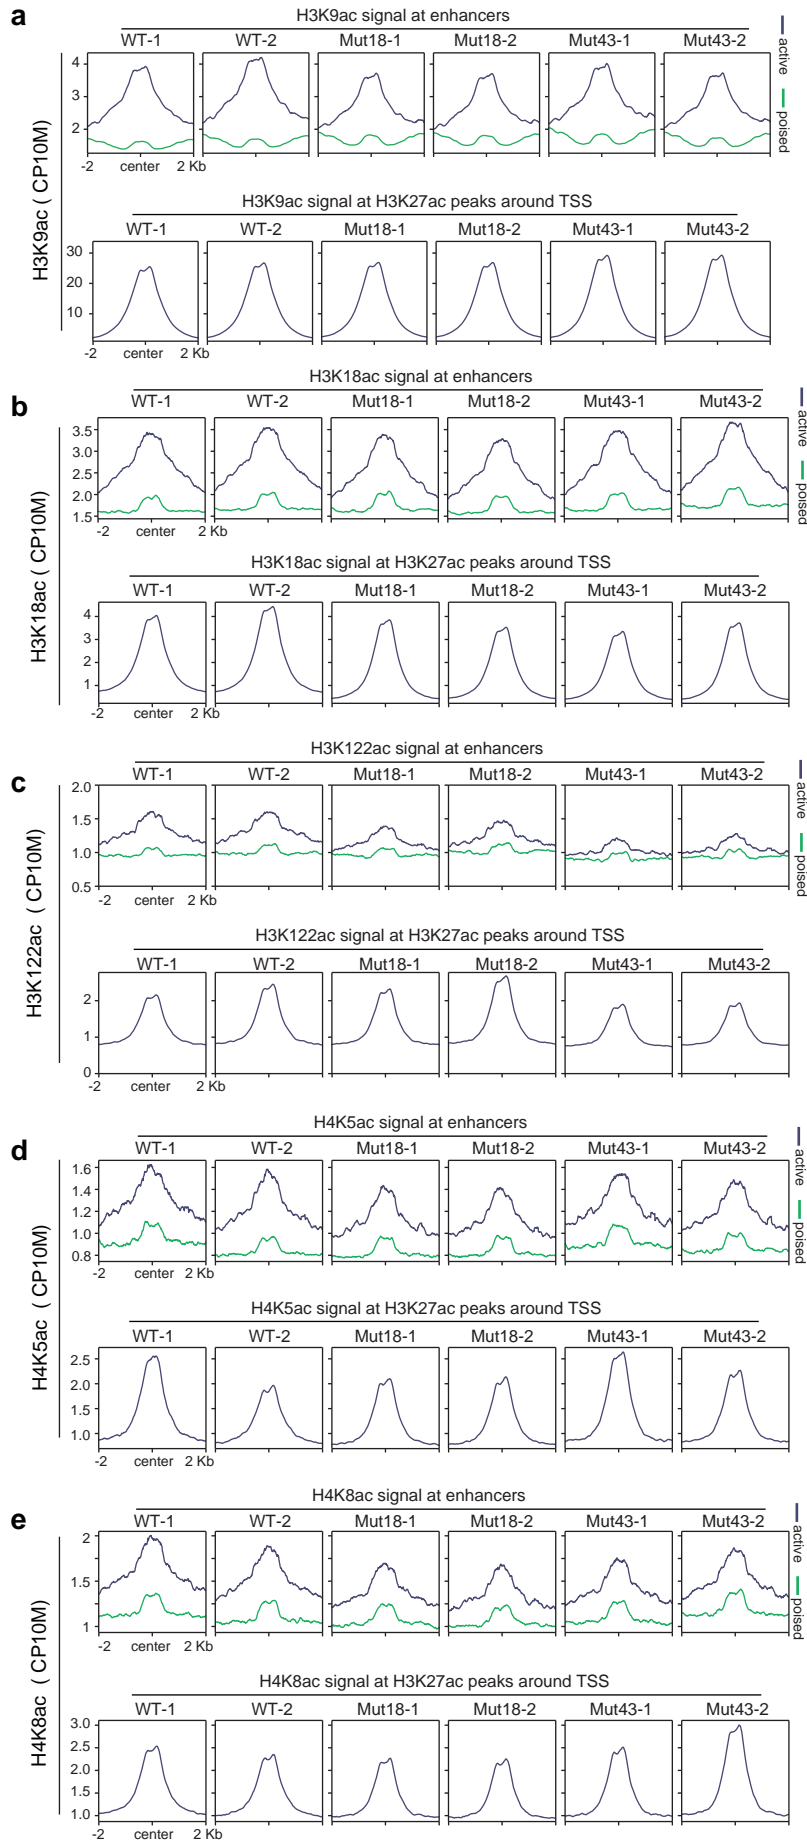

**Figure S10.** Averaged profiles of H3K9ac, H3K18ac, H3K122ac, H4K5ac, and H4K8ac at enhancers and H3K27ac-occupied promoters in WT and H3.3K27R mutant ESC lines. CP10M, counts per 10 million. (a) H3K9ac (b) H3K18ac. (c) H3K122ac. (d) H4K5ac. (e) H4K8ac.

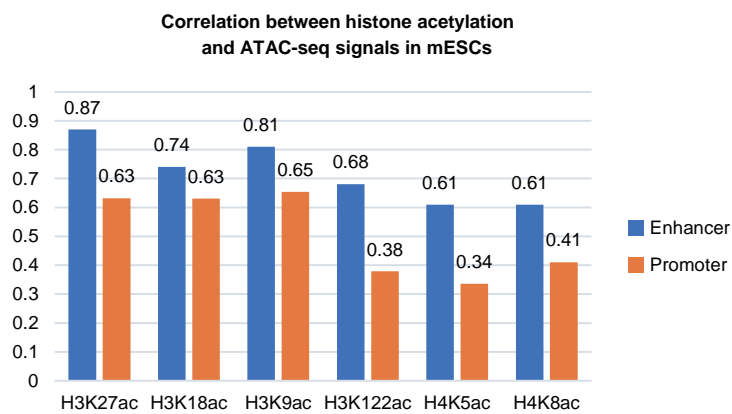

**Figure S11.** Barplots show Pearson correlation coefficients between ChIP-seq signal of histone acetylation and chromatin accessibility (ATAC-seq signal). Correlations were calculated for active enhancers (blue) and all promoter regions (upstream 1 kb and downstream 1 kb of TSS, orange) separately.
