# Supplementary material for: Histone H3K27 acetylation is dispensable for enhancer activity in mouse embryonic stem cells
Source: PubMed Central journal article supplement (PMC7035716; doi:10.1186/s13059-020-01957-w), 2020-02-21
Supplement: 13059_2020_1957_MOESM3_ESM.pdf [file 13059_2020_1957_MOESM3_ESM.pdf]

## Supplementary tables:

Table S1:

| Cell line | Sample        | Read pair#  |            |            |            |         |
|-----------|---------------|-------------|------------|------------|------------|---------|
|           |               | raw         | mapped     | mapped%    | unique     | unique% |
| WT        | input         | 23,885,044  | 22,297,522 | 93%        | 18,886,735 | 85%     |
|           | H3K4me3-1     | 18,400,948  | 15,856,970 | 86%        | 13,756,824 | 87%     |
|           | H3K4me3-2     | 24,210,337  | 20,841,804 | 86%        | 17,770,502 | 85%     |
|           | H3K9ac-1      | 36,856,117  | 33,788,837 | 92%        | 25,520,026 | 76%     |
|           | H3K9ac-2      | 35,782,354  | 32,690,051 | 91%        | 21,140,914 | 65%     |
|           | H3K18ac-1     | 26,602,778  | 24,452,925 | 92%        | 20,793,200 | 85%     |
|           | H3K18ac-2     | 35,051,721  | 32,259,163 | 92%        | 24,771,452 | 77%     |
|           | H3K27ac-1     | 26,213,330  | 23,261,109 | 89%        | 18,680,158 | 80%     |
|           | H3K27ac-2     | 23,817,781  | 20,971,586 | 88%        | 17,172,711 | 82%     |
|           | H3K27me3-1    | 21,182,877  | 18,072,640 | 85%        | 15,881,848 | 88%     |
|           | H3K27me3-2    | 30,896,481  | 26,807,861 | 87%        | 23,367,531 | 87%     |
|           | H3K122ac-1    | 25,526,181  | 24,064,148 | 94%        | 20,334,603 | 85%     |
|           | H3K122ac-2    | 28,132,501  | 26,424,974 | 94%        | 21,635,776 | 82%     |
|           | H4K5ac-1      | 10,202,048  | 8,208,236  | 80%        | 7,243,326  | 88%     |
|           | H4K5ac-2      | 27,756,953  | 25,851,115 | 93%        | 22,272,428 | 86%     |
|           | H4K8ac-1      | 26,441,271  | 24,223,164 | 92%        | 20,025,436 | 83%     |
|           | H4K8ac-2      | 24,531,619  | 22,963,683 | 94%        | 19,586,102 | 85%     |
|           | H3K4me1-1     | 39,145,770  | 36,192,206 | 92%        | 26,470,784 | 73%     |
|           | H3K4me1-2     | 43,760,021  | 40,531,836 | 93%        | 29,275,629 | 72%     |
|           | input-of-pol2 | 28,950,695  | 26,624,558 | 92%        | 20,841,209 | 78%     |
|           | pol2-1        | 37,324,312  | 31,746,072 | 85%        | 23,495,505 | 74%     |
|           | pol2-2        | 37,511,391  | 31,708,650 | 85%        | 23,241,124 | 73%     |
|           | ATAC-seq1     | 105,741,888 | 98,002,808 | 93%        | 79,751,127 | 81%     |
| ATAC-seq2 | 65,459,899    | 60,150,705  | 92%        | 50,509,381 | 84%        |         |
| Mut18     | input         | 25,047,450  | 23,402,416 | 93%        | 19,759,711 | 84%     |
|           | H3K4me3-1     | 25,154,054  | 21,544,279 | 86%        | 18,016,666 | 84%     |
|           | H3K4me3-2     | 23,555,478  | 20,167,634 | 86%        | 17,403,898 | 86%     |
|           | H3K9ac-1      | 38,319,700  | 34,981,303 | 91%        | 24,004,054 | 69%     |
|           | H3K9ac-2      | 32,085,509  | 29,261,277 | 91%        | 21,733,535 | 74%     |
|           | H3K18ac-1     | 24,436,257  | 21,844,233 | 89%        | 17,948,555 | 82%     |
|           | H3K18ac-2     | 28,967,864  | 25,949,570 | 90%        | 22,222,307 | 86%     |
|           | H3K27ac-1     | 27,050,019  | 22,944,017 | 85%        | 17,271,636 | 75%     |
|           | H3K27ac-2     | 26,379,413  | 21,453,774 | 81%        | 17,283,648 | 81%     |
|           | H3K27me3-1    | 31,116,112  | 26,616,229 | 86%        | 22,510,542 | 85%     |
|           | H3K27me3-2    | 21,720,186  | 18,309,446 | 84%        | 15,780,325 | 86%     |
|           | H3K122ac-1    | 23,911,027  | 22,447,690 | 94%        | 18,104,337 | 81%     |
|           | H3K122ac-2    | 19,404,681  | 18,133,174 | 93%        | 14,869,906 | 82%     |

|       |               |            |            |     |            |     |
|-------|---------------|------------|------------|-----|------------|-----|
|       | H4K5ac-1      | 26,559,917 | 24,669,036 | 93% | 20,614,095 | 84% |
|       | H4K5ac-2      | 24,233,913 | 22,608,068 | 93% | 19,244,445 | 85% |
|       | H4K8ac-1      | 25,931,779 | 24,377,372 | 94% | 20,226,345 | 83% |
|       | H4K8ac-2      | 24,386,907 | 22,922,680 | 94% | 19,418,963 | 85% |
|       | H3K4me1-1     | 38,261,768 | 35,861,323 | 94% | 26,216,146 | 73% |
|       | H3K4me1-2     | 35,391,427 | 33,209,335 | 94% | 24,935,277 | 75% |
|       | input-of-pol2 | 31,754,163 | 28,895,601 | 91% | 22,398,658 | 78% |
|       | pol2-1        | 42,213,190 | 37,991,833 | 90% | 27,477,254 | 72% |
|       | pol2-2        | 45,476,715 | 40,938,546 | 90% | 30,469,917 | 74% |
|       | ATAC-seq1     | 61,864,250 | 57,018,686 | 92% | 47,889,152 | 84% |
|       | ATAC-seq2     | 73,485,014 | 67,547,027 | 92% | 55,990,092 | 83% |
|       | input         | 29,165,368 | 27,301,284 | 94% | 22,201,207 | 81% |
|       | H3K4me3-1     | 20,008,629 | 16,806,529 | 84% | 14,955,107 | 89% |
|       | H3K4me3-2     | 28,615,627 | 24,064,741 | 84% | 21,093,431 | 88% |
|       | H3K9ac-1      | 30,867,020 | 27,779,347 | 90% | 20,343,129 | 73% |
|       | H3K9ac-2      | 37,152,752 | 33,565,616 | 90% | 23,976,645 | 71% |
|       | H3K18ac-1     | 25,940,870 | 23,003,419 | 89% | 20,185,611 | 88% |
|       | H3K18ac-2     | 19,644,466 | 17,386,981 | 89% | 14,867,662 | 86% |
|       | H3K27ac-1     | 24,307,376 | 19,171,901 | 79% | 15,585,540 | 81% |
|       | H3K27ac-2     | 25,423,415 | 20,192,052 | 79% | 15,502,793 | 77% |
|       | H3K27me3-1    | 26,340,713 | 21,490,302 | 82% | 19,197,118 | 89% |
|       | H3K27me3-2    | 33,141,588 | 27,076,506 | 82% | 23,897,351 | 88% |
| Mut43 | H3K122ac-1    | 26,407,881 | 24,739,382 | 94% | 20,555,031 | 83% |
|       | H3K122ac-2    | 25,899,274 | 24,308,537 | 94% | 20,081,992 | 83% |
|       | H4K5ac-1      | 19,529,320 | 17,846,303 | 91% | 15,582,343 | 87% |
|       | H4K5ac-2      | 29,939,557 | 27,271,938 | 91% | 23,190,162 | 85% |
|       | H4K8ac-1      | 23,366,480 | 21,778,950 | 93% | 18,968,748 | 87% |
|       | H4K8ac-2      | 23,271,154 | 21,634,973 | 93% | 18,181,882 | 84% |
|       | H3K4me1-1     | 35,732,218 | 33,351,569 | 93% | 26,156,161 | 78% |
|       | H3K4me1-2     | 36,196,348 | 33,811,850 | 93% | 26,041,749 | 77% |
|       | input-of-pol2 | 29,557,714 | 27,019,772 | 91% | 20,555,158 | 76% |
|       | pol2-1        | 50,923,871 | 45,057,465 | 88% | 33,470,838 | 74% |
|       | pol2-2        | 34,469,236 | 30,661,514 | 89% | 21,258,511 | 69% |
|       | ATAC-seq1     | 70,521,889 | 65,068,365 | 92% | 54,762,867 | 84% |
|       | ATAC-seq2     | 58,527,893 | 54,955,717 | 94% | 44,563,894 | 81% |

**Table S1.** Sequencing depth and mapping efficiency of ChIP-seq and ATAC-seq experiments.

**Table S2:**

| ChIP samples         | replicates | WT     | Common (WT) | Mut18  | Common (Mut18) | Mut43  | Common (Mut43) |
|----------------------|------------|--------|-------------|--------|----------------|--------|----------------|
| H3K27ac<br>(q<1e-2)  | rep1       | 43,873 | 32,442      | 11,175 | 9,788          | 18,001 | 13,142         |
|                      | rep2       | 43,625 |             | 16,737 |                | 17,547 |                |
| H3K4me1<br>(q<1e-3)  | rep1       | 67,593 | 53,858      | 57,794 | 42,873         | 70,499 | 58,926         |
|                      | rep2       | 67,024 |             | 64,026 |                | 76,652 |                |
| H3K4me3<br>(q<1e-6)  | rep1       | 32,098 | 30,893      | 37,865 | 34,848         | 36,563 | 33,648         |
|                      | rep2       | 33,891 |             | 38,449 |                | 40,751 |                |
| H3K27me3<br>(q<1e-2) | rep1       | 17,623 | 8,436       | 12,071 | 8,635          | 22,419 | 14,374         |
|                      | rep2       | 12,180 |             | 16,986 |                | 20,520 |                |
| ATAC-seq<br>(q<1e-6) | rep1       | 78,539 | 62,507      | 63,591 | 58,746         | 68,634 | 59,030         |
|                      | rep2       | 67,419 |             | 59,814 |                | 65,802 |                |

**Table S2.** Peak numbers called in ATAC-seq and ChIP-seq experiments. Common peaks between replicates are also shown for comparison.

**Table S3:**

| RNA sample | Read Pair# | Mouse (mm10)    |                              | <i>Drosophila</i> (dm6) |                              |
|------------|------------|-----------------|------------------------------|-------------------------|------------------------------|
|            |            | Uniquely mapped | gene# (read count $\geq$ 10) | Uniquely mapped         | gene# (read count $\geq$ 10) |
| WT-1       | 20,752,313 | 16,980,310      | 13,893                       | 1,589,279               | 6,413                        |
| WT-2       | 20,711,959 | 16,911,999      | 13,745                       | 1,633,919               | 6,412                        |
| Mut18-1    | 20,513,081 | 16,846,545      | 13,643                       | 1,600,657               | 6,391                        |
| Mut18-2    | 20,532,932 | 16,830,430      | 13,583                       | 1,606,794               | 6,387                        |
| Mut43-1    | 20,576,702 | 16,823,350      | 13,560                       | 1,620,143               | 6,411                        |
| Mut43-2    | 20,556,551 | 16,912,099      | 13,546                       | 1,572,220               | 6,408                        |

**Table S3.** Stats for mRNA-seq experiments. Sequencing depth and gene coverage are shown for both mouse ESC samples and *Drosophila* S2 cell spike-ins.

**Table S4:**

|                                                                        | <b>sgRNA targeting sequence with PAM (5'-3')</b> |
|------------------------------------------------------------------------|--------------------------------------------------|
| <i>H3f3a</i> sgRNA1                                                    | GCTTAATTAGCGCTCGACAC <b>CGG</b>                  |
| <i>H3f3a</i> sgRNA2                                                    | TACTAGTTGACTATACTAGA <b>GGG</b>                  |
| <i>H3f3b</i> sgRNA1                                                    | TGGTGGCCAGCTGTTTGCGG <b>GGG</b>                  |
| <i>H3f3b</i> sgRNA2                                                    | AAGCGCGCCCTCTACCGGCG <b>GGG</b>                  |
| <b>Homologous arm amplification primers (5'-3')</b>                    |                                                  |
| <i>H3f3a</i> HDR left-F                                                | GGCTCCTCTTTCTTCGGTGAAATCC                        |
| <i>H3f3a</i> HDR left-R                                                | GGCTGGAGAGATTGCTCAGCAG                           |
| <i>H3f3a</i> HDR right-F                                               | CTCTAGTATAGTCAACTAGTAATAGGACACG                  |
| <i>H3f3a</i> HDR right-R                                               | GGGTCTTATCTCCCAGCATTCTAGC                        |
| <i>H3f3b</i> HDR left-F                                                | CGAAGTACGGCCTTTGTGTGC                            |
| <i>H3f3b</i> HDR left-R                                                | GTCAGGGAGAAGGGAGAGAGC                            |
| <i>H3f3b</i> HDR right-F                                               | CGTTGACGCCTTCCTTCTTCTG                           |
| <i>H3f3b</i> HDR right-R                                               | CACATAGTGATTCTATAGCTGCCAGG                       |
| <b>K27R point mutation and PAM mutation primers (5'-3')</b>            |                                                  |
| <i>H3f3a</i> K27R AAG-AGA mut-F                                        | TCGCAGAAGTGCGCCCTC                               |
| <i>H3f3a</i> K27R AAG-AGA mut-R                                        | CACTTCTGCGAGCGGCTTTTTG                           |
| <i>H3f3a</i> gRNA1 PAM mut-F                                           | GGCGCCAGTCGAGCGCTAATTAAGCCTG                     |
| <i>H3f3a</i> gRNA1 PAM mut-R                                           | ACTGGCGCCGCCCCGGCCCACCCAGCA                      |
| <i>H3f3b</i> K27R AAA-AGG-F                                            | CGGCTCGGAGGAGCGCGCCCTCTAC                        |
| <i>H3f3b</i> K27R AAA-AGG-R                                            | GCGCGCTCCTCCGAGCCGCCTTGG                         |
| <i>H3f3b</i> gRNA1 PAM mut-F                                           | CCCGAGGAAACAGCTGGC                               |
| <i>H3f3b</i> gRNA1 PAM mut-R                                           | TGTTTTCTCGGGGCTTTCCCAC                           |
| <i>H3f3b</i> gRNA2 PAM mut-F                                           | CCGGAGGCGTGAAGAAGCCTCACCGCTAC                    |
| <i>H3f3b</i> gRNA2 PAM mut-R                                           | CACGCCTCCGGTAGAGGGCGCGCT                         |
| <b>Genotyping primers (5'-3')</b>                                      |                                                  |
| <i>H3f3a</i> K27R test-F                                               | GGGGTAAGTTTCTCCGTTTGC                            |
| <i>H3f3a</i> K27R test-R                                               | CCCTTAATATAACTTCGTATAATGTATGC                    |
| <i>H3f3b</i> K27R test-F                                               | ACCAAGGCGGCTCGGAGG                               |
| <i>H3f3b</i> K27R test-R                                               | GCCTCCTGTTGAGGACAAGAGC                           |
| <b>Genomic DNA amplification primers for Sanger sequencing (5'-3')</b> |                                                  |
| <i>H3f3a</i> K27R seq amp-F                                            | CGCGCCCTTCCAAACTAATTATATAAC                      |
| <i>H3f3a</i> K27R seq amp-R                                            | GCTGGTTGTGGTATTCACACTTG                          |
| <i>H3f3a</i> K27R seq                                                  | CGTGTCTTACTAGTTGACTATACTAG                       |
| <i>H3f3b</i> K27R seq amp-F                                            | CCAATCAGAAGAGCTCCCTAGTGC                         |
| <i>H3f3b</i> K27R seq amp-R                                            | GCCTCCTGTTGAGGACAAGAGC                           |
| <i>H3f3b</i> K27R seq                                                  | GGCGCAGCCTGAGTCATTAG                             |
| <b>Reverse transcription primers for Sanger sequencing (5'-3')</b>     |                                                  |
| <i>H3f3a</i> cDNA-F                                                    | CCTCGGTGTCAGCCATCTTTC                            |

|                     |                          |
|---------------------|--------------------------|
| <i>H3f3a</i> cDNA-R | CCCTCATAGTGGACTCTTAAGCAC |
| <i>H3f3b</i> cDNA-F | CCGATTGCGGCTCTTGTTG      |
| <i>H3f3b</i> cDNA-R | ACCGCTTCAACTTAAGCTCTCTC  |

---

**Table S4.** Sequences of DNA oligos used in this study.
